# Supplementary material for: Socio-Demographic Determinants of Diet Quality in Australian Adults Using the Validated Healthy Eating Index for Australian Adults (HEIFA-2013)
Source: PubMed Central journal article supplement (PMC5371913; doi:10.3390/healthcare5010007), 2017-02-04
Supplement: healthcare-05-00007-s001.pdf [file healthcare-05-00007-s001.pdf]

# Supplementary Materials: Socio-Demographic Determinants of Diet Quality in Australian Adults Using the Validated Healthy Eating Index for Australian Adults (HEIFA-2013)

Amanda Grech, Zhixian Sui, Hong Ying Siu, Miaobing Zheng, Margaret Allman-Farinelli and Anna Rangan

**Table S1.** Mean (SD) for individual components of Healthy Eating Index for Australian Adults (HEIFA-2013) score (discretionary food, vegetable, fruit, grain, meat, dairy, water, unsaturated fat, sodium, and added sugar and alcohol scores) for demographic and socio-economic characteristics for all respondents of the National Nutrition and Physical Activity Survey–2011/2012.

| Score              | Mean (SD) | Grain     | Veg.      | Fruit     | Dairy     | Meat      | Water     | D.F.      | Fat       | Sodium    | A.S.      | Alcohol   |
|--------------------|-----------|-----------|-----------|-----------|-----------|-----------|-----------|-----------|-----------|-----------|-----------|-----------|
| <b>Gender</b>      |           |           |           |           |           |           |           |           |           |           |           |           |
|                    | Male      | 2.4 (2.4) | 4.1 (2.7) | 3.3 (4)   | 4 (3.7)   | 5.4 (4.1) | 4.2 (1.5) | 4.2 (4.3) | 3.4 (2.6) | 3.4 (4.1) | 5.0 (4.3) | 3.9 (2.1) |
|                    | Female    | 1.8 (2.2) | 4.3 (2.8) | 3.6 (4)   | 3.8 (3.5) | 5 (3.8)   | 4.6 (1)   | 5.5 (4.2) | 3.9 (2.8) | 5.3 (4.3) | 5.1 (4.3) | 4.5 (1.5) |
| <b>Age (years)</b> |           |           |           |           |           |           |           |           |           |           |           |           |
|                    | 18–24     | 2.2 (2.2) | 3.7 (2.6) | 2.5 (3.6) | 3.9 (3.8) | 5.2 (4)   | 4.2 (1.5) | 4.5 (4.3) | 3.6 (2.7) | 3.4 (4.2) | 3.8 (4.2) | 4.6 (1.4) |
|                    | 25–34     | 2.3 (2.3) | 4.1 (2.7) | 3.1 (3.8) | 4.1 (3.7) | 5.2 (4)   | 4.3 (1.4) | 4.5 (4.3) | 3.6 (2.7) | 3.8 (4.2) | 4.4 (4.3) | 4.4 (1.6) |
|                    | 35–44     | 2.1 (2.2) | 4.1 (2.7) | 3.1 (3.9) | 4.1 (3.6) | 5.3 (4)   | 4.4 (1.3) | 4.7 (4.3) | 3.7 (2.8) | 4.1 (4.3) | 4.9 (4.3) | 4.1 (1.9) |
|                    | 45–54     | 2 (2.3)   | 4.1 (2.8) | 3.5 (4)   | 3.9 (3.6) | 5.4 (4)   | 4.4 (1.2) | 4.9 (4.3) | 3.8 (2.7) | 4.4 (4.4) | 5.6 (4.3) | 4.1 (1.9) |
|                    | 55–64     | 1.9 (2.3) | 4.4 (2.9) | 3.8 (4)   | 3.7 (3.5) | 5.3 (4)   | 4.5 (1.2) | 5 (4.3)   | 3.8 (2.7) | 4.9 (4.3) | 5.7 (4.2) | 4 (2)     |
|                    | 65–74     | 2 (2.4)   | 4.5 (2.8) | 4.2 (4.1) | 3.6 (3.4) | 5 (4)     | 4.6 (1)   | 5.6 (4.2) | 3.7 (2.7) | 5.3 (4.3) | 5.7 (4.2) | 4.2 (1.8) |
|                    | 75+       | 1.9 (2.4) | 4.4 (2.8) | 4.3 (4)   | 3.5 (3.4) | 4.4 (3.8) | 4.6 (1)   | 5.7 (4.1) | 3.4 (2.8) | 5.7 (4.2) | 5 (4.2)   | 4.5 (1.5) |
| <b>BMI</b>         |           |           |           |           |           |           |           |           |           |           |           |           |
|                    | <18.5     | 2.1 (2.4) | 4.1 (2.9) | 3.2 (4)   | 4.2 (3.9) | 4.6 (3.8) | 4.2 (1.6) | 4.7 (4.5) | 4.1 (2.9) | 4.2 (4.5) | 4.1 (4.3) | 4.5 (1.6) |
|                    | 18.5–24.9 | 2.3 (2.4) | 4.4 (2.8) | 3.8 (4.1) | 4.1 (3.7) | 5.1 (4)   | 4.5 (1.2) | 4.8 (4.3) | 3.7 (2.8) | 4.4 (4.3) | 5 (4.3)   | 4.2 (1.8) |
|                    | 25.0–29.9 | 2.2 (2.4) | 4.2 (2.7) | 3.6 (4)   | 3.9 (3.6) | 5.3 (4)   | 4.4 (1.3) | 4.7 (4.3) | 3.7 (2.7) | 4.2 (4.3) | 5.2 (4.2) | 4.1 (1.9) |
|                    | ≥30.0     | 1.7 (2)   | 4.1 (2.8) | 3.1 (3.8) | 3.8 (3.6) | 5.4 (4)   | 4.4 (1.3) | 4.8 (4.3) | 3.5 (2.7) | 4.4 (4.4) | 4.8 (4.3) | 4.3 (1.8) |
| <b>SEIFA</b>       |           |           |           |           |           |           |           |           |           |           |           |           |
|                    | 1-Lowest  | 1.8 (2.2) | 4.0 (2.8) | 2.8 (3.8) | 3.7 (3.6) | 4.8 (4)   | 4.3 (1.4) | 4.9 (4.3) | 3.6 (2.8) | 4.6 (4.4) | 4.8 (4.4) | 4.3 (1.7) |
|                    | 2         | 1.9 (2.3) | 4.2 (2.8) | 3 (3.8)   | 3.8 (3.7) | 5.2 (4)   | 4.4 (1.3) | 4.9 (4.3) | 3.5 (2.6) | 4.6 (4.3) | 4.8 (4.3) | 4.3 (1.8) |
|                    | 3         | 2.1 (2.3) | 4.2 (2.7) | 3.5 (4)   | 3.9 (3.6) | 5.2 (4)   | 4.4 (1.3) | 4.7 (4.3) | 3.6 (2.8) | 4.4 (4.4) | 4.8 (4.2) | 4.2 (1.8) |
|                    | 4         | 2.1 (2.3) | 4.2 (2.7) | 3.9 (4.1) | 3.9 (3.5) | 5.3 (4)   | 4.5 (1.2) | 5.1 (4.3) | 3.6 (2.8) | 4.3 (4.3) | 5.3 (4.2) | 4.2 (1.8) |
|                    | 5-Highest | 2.3 (2.4) | 4.3 (2.7) | 4 (4.2)   | 4 (3.6)   | 5.4 (4)   | 4.5 (1.1) | 5 (4.3)   | 3.8 (2.7) | 4.4 (4.3) | 5.6 (4.2) | 4.1 (1.9) |
| <b>COB</b>         |           |           |           |           |           |           |           |           |           |           |           |           |
|                    | Australia | 1.9 (2.2) | 4.2 (2.8) | 3.3 (3.9) | 4 (3.6)   | 5.2 (4)   | 4.4 (1.3) | 4.6 (4.3) | 3.5 (2.7) | 4.2 (4.3) | 4.8 (4.3) | 4.2 (1.9) |
|                    | English   | 2 (2.3)   | 4.2 (2.8) | 3.7 (4.1) | 4.1 (3.6) | 5.1 (4)   | 4.4 (1.2) | 4.8 (4.3) | 3.6 (2.8) | 4.5 (4.3) | 5.3 (4.2) | 4 (2)     |
|                    | Others    | 2.8 (2.5) | 4.4 (2.7) | 4.1 (4.1) | 3.2 (3.5) | 5.3 (4)   | 4.7 (1)   | 6.6 (4)   | 4.4 (2.7) | 5.3 (4.4) | 6.1 (4.2) | 4.7 (1.3) |

Veg: Vegetables, D.F. Discretionary foods, A.S.: Added sugars, R: Referent, BMI: Body Mass Index., UW: Under-weight, OW: Over-weight, SEIFA: Socio-Economic Index for Area of disadvantage, COB: Country of Birth; <sup>1</sup> English: English speaking countries including New Zealand, United Kingdom, Ireland, United States of America, Canada or South Africa.
